# Supplementary material
Source: PubMed Central journal article supplement (PMC4724472)
Supplement: NIHMS749231-supplement.pdf [file NIHMS749231-supplement.pdf]

|                                    |                           |                          |                         |                       |
|------------------------------------|---------------------------|--------------------------|-------------------------|-----------------------|
| Fluorescent Tracer                 | 500 nm Polystyrene Sphere | 50 nm Polystyrene Sphere | 500 kDa (30 nm) Dextran | 10 kDa (5 nm) Dextran |
| Zeta Potential (mV)                | -31.3                     | -15.1                    | -2.2                    | -1.7                  |
| Fluorescent Tag ( $\lambda$ Ex/Em) | 580/610                   | 660/680                  | 700/720                 | 610/630               |

**Supplementary Table S1. TSF tracer panel zeta potentials and fluorescent excitations/emissions.**

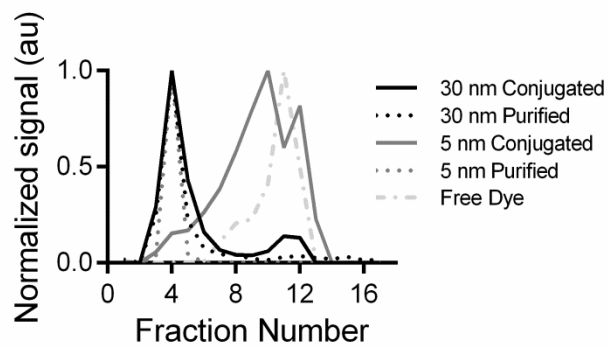

**Supplementary Figure S1. Preparative and analytical size-exclusion chromatography demonstrating separation of free dye from TSF tracer dextran conjugates.**

| Limit of detection (pM) for: | 10 kDa Dextran (610/630) | 500 kDa Dextran (700/720) | 50 nm Sphere (660/680) | 500 nm Sphere (580/610) |
|------------------------------|--------------------------|---------------------------|------------------------|-------------------------|
| Lymph Node                   | 290                      | 180                       | 5.0                    | 3.72E-04                |
| Tumor                        | 7000                     | 280                       | 30                     | 4.54E-03                |
| Spleen                       | 660                      | 210                       | 10                     | 3.40E-03                |
| Lung                         | 1460                     | 460                       | 6.0                    | 1.88E-03                |
| Liver                        | 10000                    | 800                       | 180                    | 2.60E-02                |
| Kidney                       | 3350                     | 270                       | 30                     | 4.35E-03                |

**Supplementary Table S2. TSF tracers with respective fluorescence settings (Excitation/Emission) detection limits (pM) within tissue homogenates.**
